# Supplementary material for: Feedbacks, Bifurcations, and Cell Fate Decision-Making in the p53 System
Source: PLOS journal article supplement (doi:10.1371/journal.pcbi.1004787), 2016-02-29
Supplement: S5 (10.1371/journal.pcbi.1004787.s005) [file journal.pcbi.1004787.s005]

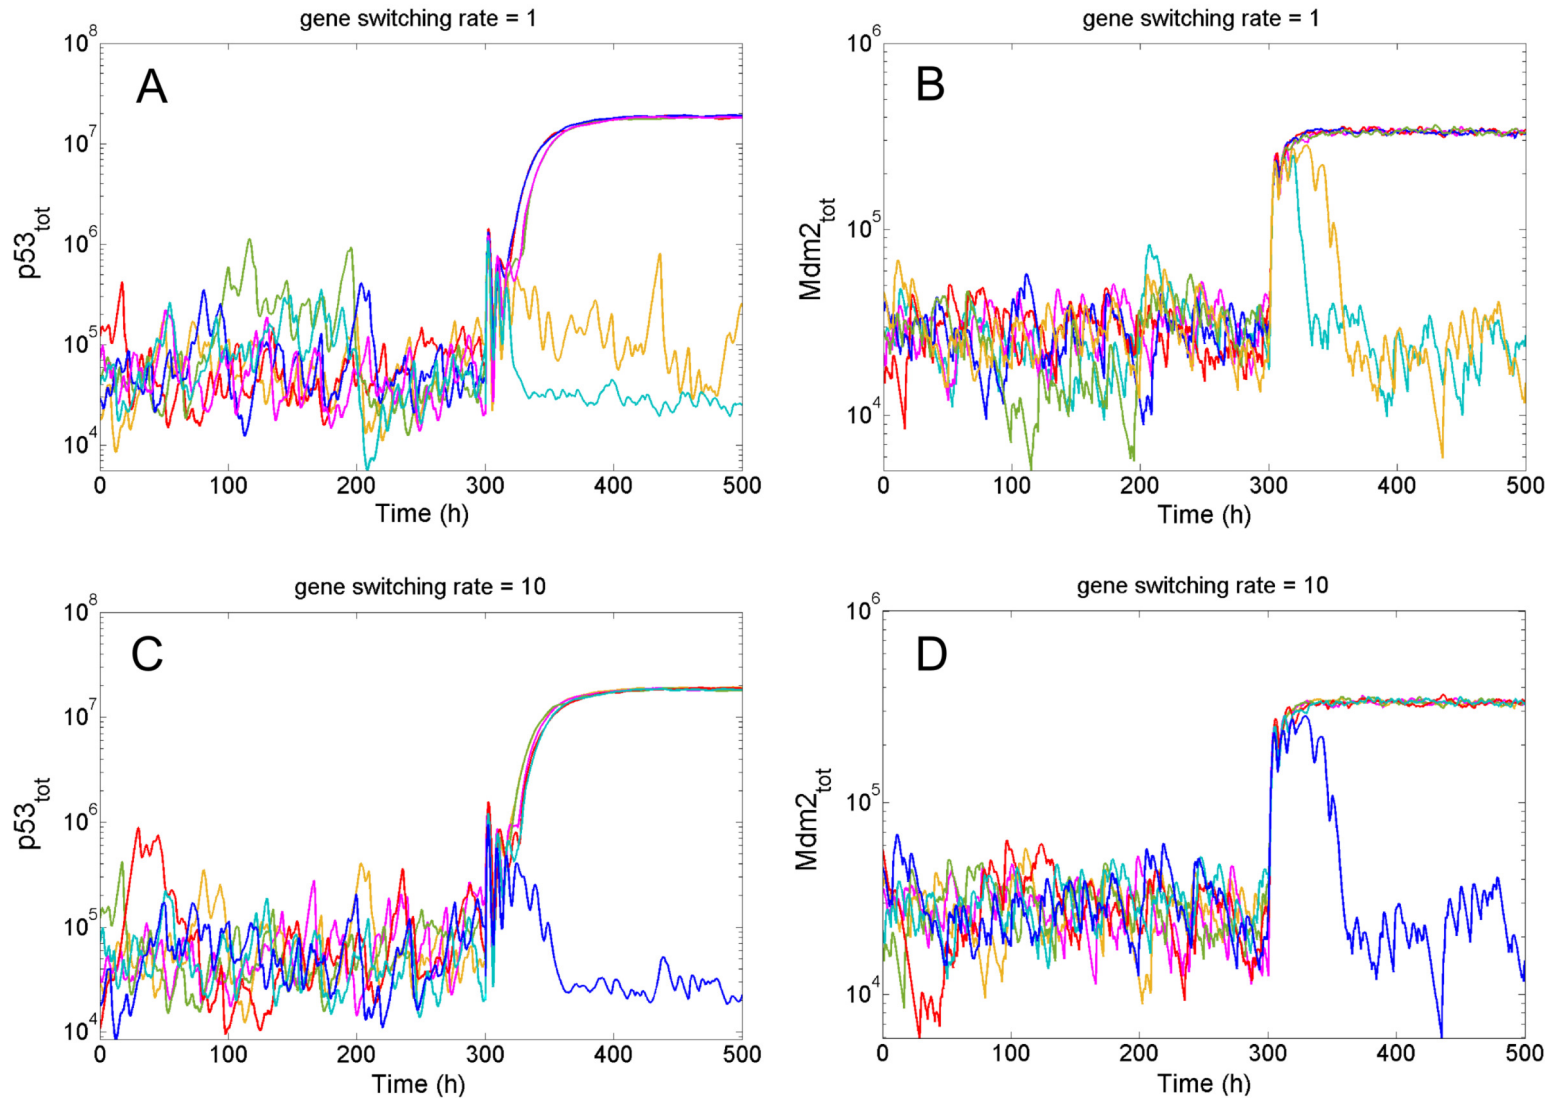

**S4 Figure: Influence of the gene switching rates on single-cell stochastic trajectories for p53<sub>tot</sub> and Mdm2<sub>tot</sub>.** (A) and (B): nominal gene switching rates. (C) and (D): 10-fold increased gene switching rates. The irradiation phase started at Time = 300 h and lasted for 10 min, the irradiation dose was 4 Gy. The dynamics of the p53<sub>tot</sub> and Mdm2<sub>tot</sub> weakly depends on the gene switching rate, although its increase leads to some decrease of the amplitude of fluctuations in unstimulated cells. Notice the logarithmic scale on vertical axes.
